# Supplementary material for: Absence of a dose-response relationship after intra-oropharyngeal inoculation of pigs with foot-and-mouth disease virus serotype O
Source: Research Square preprint supplement (doi:10.21203/rs.3.rs-8095449/v1), 2026-01-19
Supplement: Supplementary file 1 [file ea6061ca635c6f907449ca7d.xlsx]

## Sheet: Tabelle1
O/FRA/2001-P1(O/BUL/2011) (from infectious clone, three cell culture passages)
1.3 × 106 , IOP	serum samples					mouth swab samples					nasal swab samples					post mortem tissue samples
dpi	0	2	4	8	10	0	2	4	8	10	0	2	4	8	10	Ln mand R	Ln axil L	Ln axil R	Ln popl L	Ln popl R	TSP	TPE
Pig 13	neg	neg	neg	n/t	neg	neg	neg	neg	neg	neg	neg	neg	neg	neg	neg	33.24	neg	neg	28.07	27.63	30.11	neg
Pig 14	neg	neg	neg	n/t	neg	neg	neg	neg	neg	neg	neg	neg	neg	neg	neg	neg	neg	neg	28.32	27.97	32.48	neg
Pig 15	neg	30.14	23.66	n/t		neg	neg	neg	31.54		neg	neg	neg	31.54		neg	neg	30.85	33.87	30.56	neg	neg
Pig 16	neg	neg	neg	n/t		neg	neg	neg	neg		neg	neg	neg	32.98		neg	32.79	neg	26.52	25.34	neg	neg
Pig 17	neg	neg	neg	n/t	33.39	neg	neg	neg	neg	33.18	neg	neg	neg	neg	neg	neg	neg	neg	27.04	27.13	30.35	34
Pig 18	neg	neg	28.51	neg		neg	neg	neg	34.72		neg	neg	neg	33.14		neg	neg	32.19	neg	32.46	neg	neg
O/FRA/2001-P1(O/BUL/2011) (from infectious clone, three cell culture passages)
1.1 × 105, IOP	serum samples					mouth swab samples					nasal swab samples
dpi	0	2	4	8	10	0	2	4	8	10	0	2	4	8	10
Pig 7	neg	neg	neg	n/t	neg	neg	neg	neg	neg	neg	neg	neg	neg	neg	neg			n/t = not tested or no sample available
Pig 8	neg	neg	neg	n/t	neg	neg	neg	neg	neg	neg	neg	neg	neg	neg	neg			ct-values > 35 are considered negative for FMDV RNA
Pig 9	neg	neg	neg	n/t	neg	neg	neg	neg	neg	neg	neg	neg	neg	neg	neg
Pig 10	neg	neg	neg	n/t	neg	neg	neg	neg	neg	neg	neg	neg	neg	neg	neg			Ln mand R	right mandibular lymph node
Pig 11	neg	neg	neg	n/t	neg	neg	neg	neg	neg	neg	neg	neg	neg	neg	neg			Ln axil L	left axillar lymph node
Pig 12	neg	neg	neg	n/t	neg	neg	neg	neg	neg	neg	neg	neg	neg	neg	neg			Ln axil R	right axillar lymph node
																		Ln popl L	left popliteal lymph node
O/FRA/2001-P1(O/BUL/2011) (from infectious clone, three cell culture passages)																		Ln popl R	right popliteal lymph node
1.0 × 104, IOP	serum samples					mouth swab samples					nasal swab samples							TSP	tonsil of the soft palate
dpi	0	2	4	8	10	0	2	4	8	10	0	2	4	8	10			TPE	epiglottal tonsils
Pig 1	neg	neg	neg	n/t	neg	neg	neg	neg	neg	neg	neg	neg	neg	neg	neg
Pig 2	neg	neg	neg	n/t	neg	neg	neg	neg	neg	neg	neg	neg	neg	neg	neg
Pig 3	neg	neg	neg	n/t	neg	neg	neg	neg	neg	neg	neg	neg	neg	neg	neg
Pig 4	neg	neg	neg	n/t	neg	neg	neg	neg	neg	neg	neg	neg	neg	neg	neg
Pig 5	neg	neg	neg	n/t	neg	neg	neg	neg	neg	neg	neg	neg	neg	neg	neg
Pig 6	neg	neg	neg	n/t	neg	neg	neg	neg	neg	neg	neg	neg	neg	neg	neg
O/FRA/2001-P1(O/BUL/2011) (1st pig passage)
1.3 × 106, IOP	serum samples					mouth swab samples					nasal swab samples					post mortem tissue samples
dpi	0	2	4	5	6	0	2	4	5	6	0	2	4	5	6	Ln mand R	Ln axil L	Ln axil R	Ln popl L	Ln popl R	TSP	TPE
Pig 7	neg	neg	21			neg	neg	neg			neg	neg	34.01			neg	neg	neg	30.02	neg	neg	neg
Pig 8	neg	neg	neg	neg	neg	neg	neg	32.59	n/t	neg	neg	neg	neg	n/t	neg	neg	neg	neg	neg	neg	neg	34.24
Pig 9	neg	neg	neg	n/t	25.55	neg	neg	33.3	n/t	neg	neg	neg	34.86	n/t	neg	neg	neg	neg	neg	neg	neg	neg
Pig 10	neg	28.58				neg	31.42				neg	32.61				34.69	32.71	neg	29.78	31.58	neg	neg
Pig 11	neg	neg	24.37			neg	neg	neg			neg	neg	neg			neg	neg	33.28	34.7	28.98	neg	neg
Pig 12	neg	neg	30.47	23.88			neg	32.71	32.86		neg	34.84	31.4	neg			neg	34.79	31.6	32.57	neg	neg
O/FRA/2001-P1(O/BUL/2011) (from infectious clone, three cell culture passages)
2.9 × 105, IDHB	serum samples		mouth swab samples		nasal swab samples		post mortem tissue samples
dpi	0	2	0	2	0	2	Ln mand R	Ln axil L	Ln axil R	Ln popl L	Ln popl R	TSP	TPE
Pig 19	neg	neg	neg	29.2032	n/t	n/t	n/t	n/t	n/t	n/t	n/t	n/t	n/t
Pig 20	neg	17.8213	neg	28.8184	n/t	n/t	n/t	n/t	n/t	n/t	n/t	n/t	n/t
Pig 21	neg	17.8404	neg	28.4088	n/t	n/t	n/t	n/t	n/t	n/t	n/t	n/t	n/t
Pig 22	neg	18.3548	neg	28.4544	n/t	n/t	n/t	n/t	n/t	n/t	n/t	n/t	n/t
O/FRA/2001-P1(O/BUL/2011) (2nd pig passage)
4.6 × 102, IOP	serum samples					mouth swab samples						nasal swab samples
dpi	0	2	4	10	14	0	2	4	8	10	14	0	2	4	8	10	14
Pig 23	neg	neg	neg	neg	neg	neg	neg	neg	neg	neg	neg	neg	neg	neg	neg	neg	neg
Pig 24	neg	neg	neg	neg	neg	neg	neg	neg	neg	neg	neg	neg	neg	neg	neg	neg	neg
Pig 25	neg	neg	neg	neg	neg	neg	neg	neg	neg	neg	neg	neg	neg	neg	neg	neg	neg
Pig 26	neg	neg	neg	neg	neg	neg	neg	neg	neg	neg	neg	neg	neg	neg	neg	neg	neg
Pig 27	neg	neg	neg	neg	neg	neg	neg	neg	neg	neg	neg	neg	neg	neg	neg	neg	neg
Pig 28	neg	neg	neg	neg	neg	neg	neg	neg	neg	neg	neg	neg	neg	neg	neg	neg	neg
O/FRA/2001-P1(O/BUL/2011) (2nd pig passage)
7.2 × 102, IDHB	serum samples					mouth swab samples					nasal swab samples					post mortem tissue samples
dpi	1	2	3	4	5	1	2	3	4	5	1	2	3	4	5	Ln mand R	Ln axil L	Ln axil R	Ln popl L	Ln popl R	TSP	TPE
Pig 23	neg	n/t	n/t	32.31	n/t	neg	n/t	n/t	neg	n/t	neg	n/t	n/t	neg	n/t	neg	neg	neg	neg	neg	neg	neg
Pig 24	neg	26.68	n/t	n/t	n/t	neg	neg	n/t	n/t	n/t	neg	neg	n/t	n/t	n/t	neg	neg	neg	neg	neg	neg	neg
Pig 25	neg	neg	n/t	31.45	23.65	neg	neg	n/t	neg	neg	neg	neg	n/t	neg	neg	neg	neg	neg	31.21	neg	neg	neg
Pig 26	31.84	22.99	n/t	n/t	n/t	neg	32.72	n/t	n/t	n/t	neg	34.63	n/t	n/t	n/t	neg	neg	neg	neg	34.11	neg	neg
Pig 27	neg	neg	n/t	25.78	25.82	neg	neg	n/t	neg	33.02	neg	neg	n/t	neg	33.61	neg	neg	neg	30.06	29.44	neg	neg
Pig 28	neg	27.05	23.56	n/t	n/t	neg	neg	neg	n/t	n/t	neg	neg	neg	n/t	n/t	34.2	neg	neg	32.97	26.82	34.96	neg
O/FRA/2001-P1(O/BUL/2011) (2nd pig passage)
2.6 × 103, IOP	serum samples				mouth swab samples					nasal swab samples					post mortem tissue samples
dpi	0	2	4	10	0	2	4	8	10	0	2	4	8	10	Ln mand R	Ln axil L	Ln axil R	Ln popl L	Ln popl R	TSP	TPE
Pig 29	neg	neg	neg	neg	neg	neg	neg	neg	neg	neg	neg	neg	neg	neg	neg	neg	neg	neg	neg	neg	neg
Pig 30	neg	neg	neg	neg	neg	neg	neg	neg	neg	neg	neg	neg	neg	neg	neg	neg	neg	neg	neg	neg	neg
Pig 31	neg	neg	neg	neg	neg	neg	neg	neg	neg	neg	neg	neg	neg	neg	neg	neg	neg	neg	neg	neg	neg
Pig 32	neg	neg	neg	neg	neg	neg	neg	neg	neg	neg	neg	neg	neg	neg	neg	neg	neg	neg	neg	neg	neg
Pig 33	neg	neg	neg	neg	neg	neg	neg	neg	neg	neg	neg	neg	neg	neg	neg	neg	neg	neg	neg	neg	neg
Pig 34	neg	neg	neg	neg	neg	neg	neg	neg	neg	neg	neg	neg	neg	neg	neg	neg	neg	neg	neg	neg	neg
O/FRA/2001-P1(O/BUL/2011) (2nd pig passage)
1.7 ×104, IOP	serum samples				mouth swab samples					nasal swab samples
dpi	0	2	4	10	0	2	4	8	10	0	2	4	8	10
Pig 35	neg	neg	neg	neg	neg	neg	neg	neg	neg	neg	neg	neg	neg	neg
Pig 36	neg	neg	neg	neg	neg	neg	neg	neg	neg	neg	neg	neg	neg	neg
Pig 37	neg	neg	neg	neg	neg	neg	neg	neg	neg	neg	neg	neg	neg	neg
Pig 38	neg	neg	neg	neg	neg	neg	neg	neg	neg	neg	neg	neg	neg	neg
Pig 39	neg	neg	neg	neg	neg	neg	neg	neg	neg	neg	neg	neg	neg	neg
Pig 40	neg	neg	neg	neg	neg	neg	neg	neg	neg	neg	neg	neg	neg	neg
O/FRA/2001-P1(O/BUL/2011) (2nd pig passage)
8.0 × 106, IOP	serum samples				mouth swab samples					nasal swab samples					post mortem tissue samples
dpi	0	2	4	10	0	2	4	8	10	0	2	4	8	10	Ln mand R	Ln axil L	Ln axil R	Ln popl L	Ln popl R	TSP	TPE
Pig 35	neg	neg	neg	neg	neg	neg	neg	neg	neg	neg	neg	neg	neg	neg	neg	neg	neg	neg	neg	neg	neg
Pig 36	neg	neg	neg	neg	neg	neg	neg	neg	neg	neg	neg	neg	neg	neg	neg	neg	neg	neg	neg	neg	neg
Pig 37	neg	neg	neg	neg	neg	neg	neg	neg	neg	neg	neg	neg	neg	neg	neg	neg	neg	neg	neg	neg	neg
Pig 38	neg	neg	neg	neg	neg	neg	neg	neg	neg	neg	neg	neg	neg	neg	neg	neg	neg	neg	neg	neg	neg
Pig 39	neg	neg	neg	neg	neg	neg	neg	neg	neg	neg	neg	neg	neg	neg	neg	neg	neg	neg	neg	neg	neg
Pig 40	neg	neg	neg	neg	neg	neg	neg	neg	neg	neg	neg	neg	neg	neg	neg	neg	neg	neg	neg	neg	neg
O/TAW/97 (field isolate, two cell culture passages)
9.2 × 104, IOP	serum samples			mouth swab samples			nasal swab samples
dpi	0	2	4	0	2	4	0	2	4
Pig 41	neg	neg	neg	neg	neg	neg	neg	neg	neg
Pig 42	neg	neg	neg	neg	neg	neg	neg	neg	neg
Pig 43	neg	neg	neg	neg	neg	neg	neg	neg	neg
Pig 44	neg	neg	neg	neg	neg	neg	neg	neg	neg
Pig 45	neg	neg	neg	neg	neg	neg	neg	neg	neg
Pig 46	neg	neg	neg	neg	neg	neg	neg	neg	neg
O/TAW/97 (field isolate, two cell culture passages)
1.0 × 105, IDHB	serum samples				mouth swab samples				nasal swab samples
dpi	0	2	3	4	0	2	3	4	0	2	3	4
Pig 41	neg	neg	28.33		neg	neg	neg		neg	neg	neg
Pig 42	neg	neg	27.75		neg	neg	neg		neg	neg	neg
Pig 43	neg	neg	neg	28.61	neg	neg	neg	neg	neg	neg	neg	neg
Pig 44	neg	neg	neg	31.62	neg	neg	neg	neg	neg	neg	neg	neg
Pig 45	neg	neg	neg	33.1	neg	neg	neg	neg	neg	neg	neg	neg
Pig 46	neg	neg	neg	28.99	neg	neg	neg	neg	neg	neg	neg	neg
Quantification of Viral RNA at The Pirbright Institute
